# Supplementary material
Source: publisher site journal article supplement (https://www.dovepress.com/article/445708)
Supplement: Supplementary file 1 [file get_supplementary_file.php]

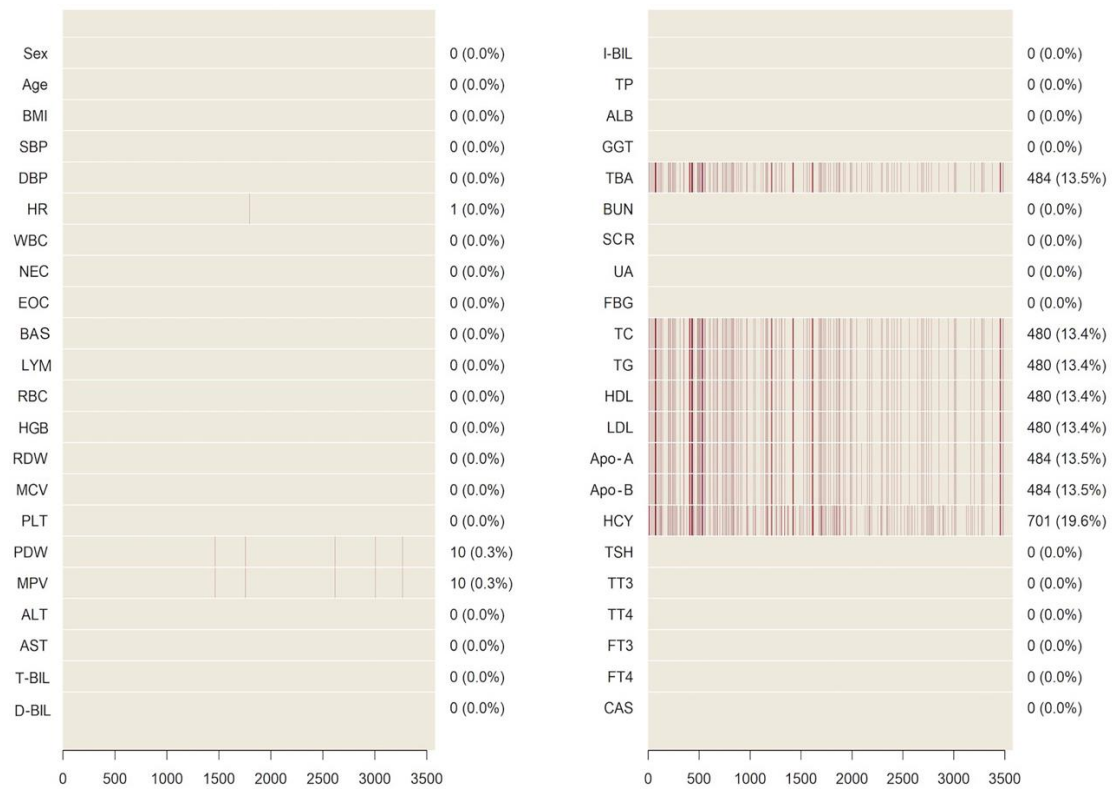

**Figure S1** The distribution of the missing data.

**Abbreviations:** BMI, body mass index; SBP, systolic blood pressure; DBP, diastolic blood pressure; HR, heart rate; WBC, white blood cell count; NEC, neutrophil count; EOC, eosinophil count; BAS, basophil count; LYM, lymphocyte count; RBC, red blood cell count; HGB, hemoglobin; RDW, red blood cell distribution width; MCV, mean red blood cell volume; PLT, platelet count; PDW, platelet distribution width; MPV, mean platelet volume; ALT, alanine aminotransferase; AST, aspartate aminotransferase; T-BIL, total bilirubin; D-BIL, direct bilirubin; I-BIL, indirect bilirubin; TP, total protein; ALB, albumin; GGT, gamma-glutamyl transpeptidase; TBA, total bile acids; BUN, blood urea nitrogen; SCR, serum creatinine; UA, uric acid; FBG, fasting blood glucose; TC, total cholesterol; TG, triglycerides; HDL, high-density lipoprotein; LDL, low-density lipoprotein; Apo-A, apolipoprotein-A; Apo-B, apolipoprotein-B; HCY, homocysteine; TSH, thyroid stimulating hormone; TT3, total triiodothyronine; TT4, total tetraiodothyronine; FT3, free triiodothyronine; FT4, free tetraiodothyronine; CAS, carotid atherosclerosis.
